# Supplementary material for: Balance of mechanical forces drives endothelial gap formation and may facilitate cancer and immune-cell extravasation
Source: PLOS journal article supplement (doi:10.1371/journal.pcbi.1006395), 2019-05-02
Supplement: S2 (10.1371/journal.pcbi.1006395.s002) [file journal.pcbi.1006395.s002]

| Parameter                                                 | Symbol                   | Value                                                      | Source                       |
|-----------------------------------------------------------|--------------------------|------------------------------------------------------------|------------------------------|
| Medium drag coefficient                                   | $\xi$                    | $4.1 \cdot 10^{-3} \text{ (kg/s)}$                         | [15]                         |
| Membrane stiffness                                        | $K_{memb}$               | $2.5 \cdot 10^{-3} \text{ (kg/s}^2\text{)}$                | [16]                         |
| Stress fiber stiffness                                    | $K_{sf}$                 | $1.25 \cdot 10^{-4} \text{ (kg/s}^2\text{)}$               | [15]                         |
| Rotational spring constant                                | $K_{bend}$               | $7.5 \cdot 10^{-17} \text{ (Nm)}$                          | [16]                         |
| Membrane viscosity                                        | $\eta_{memb}$            | $1.109 \cdot 10^{-3} \text{ (kg/s)}$                       | [16]                         |
| Stress fiber viscosity                                    | $\eta_{sf}$              | $1.109 \cdot 10^{-3} \text{ (kg/s)}$                       | [16]                         |
| Force to normalize parameters in unbinding law            | $F^0$                    | $0.008 \text{ (nN)}$                                       | Adjusted from [4]            |
| Non-dimensionalized force of catch curve in unbinding law | $\theta_c$               | 0.01                                                       | Adjusted from [4]            |
| Non-dimensionalized force of slip curve in unbinding law  | $\theta_s$               | 4                                                          | Adjusted from [4]            |
| Unbinding rate coefficient for catch curve                | $k_c^0$                  | $0.27 \text{ s}^{-1}$                                      | Adjusted from [4]            |
| Unbinding rate coefficient for slip curve                 | $k_s^0$                  | $0.27 \text{ s}^{-1}$                                      | Adjusted from [4]            |
| Binding rate for adhesions at maximum distance            | $k_{on}^0$               | $15.3 \text{ (}\mu\text{m}^2/(\text{mol} \cdot \text{s))}$ | Estimated from unbinding law |
| Binding rate for adhesion reinforcement at zero force     | $k_{reinf}^0$            | $11.5 \text{ (}\mu\text{m}^2/(\text{mol} \cdot \text{s))}$ | Estimated from unbinding law |
| Adhesion complex density                                  | $\rho_{adh}$             | $21 \text{ (mol}/\mu\text{m}^2\text{)}$                    | [20]                         |
| Limit distance for cadherin binding                       | $L_{bind}^{limit}$       | $0.95 \text{ (}\mu\text{m)}$                               | Estimated                    |
| Force constant for reinforcement curve                    | $\lambda_{reinf}$        | $10 \text{ nN)}$                                           | Adjusted from unbinding law  |
| Force threshold to stop applying reinforcement            | $F_{reinf}^{limit}$      | $0.06 \text{ (nN)}$                                        | Adjusted from unbinding law  |
| Adhesion complex stiffness constant per bond              | $K_{adh}^0$              | $2 \cdot 10^{-4} \text{ (kg/s)}$                           | Estimated                    |
| Adhesion complex equilibrium length                       | $L_{adh}^0$              | $0.1 \text{ (}\mu\text{m)}$                                | [14]                         |
| Maximum number of cadherins per clutch                    | $n_c^{max}$              | 8                                                          | Estimated                    |
| Maximum force due to radial contraction                   | $F_{Radial}$             | $0.775 \text{ (nN)}$                                       | Adjusted from [13]           |
| Maximum force due to cortical tension                     | $F_{cortex}$             | $0.025 \text{ (nN)}$                                       | [19]                         |
| Maximum force due to protrusion                           | $F_{Prot}$               | $0.08 \text{ (nN)}$                                        | Estimated                    |
| Force recalculation time for radial force                 | $t_{Radial}^{Force}$     | $25 \text{ min}$                                           | Estimated                    |
| Force recalculation time for cortical force               | $t_{Cortex}^{Force}$     | $25 \text{ min}$                                           | Estimated                    |
| Force recalculation time for protrusive force             | $t_{Prot}^{Force}$       | $25 \text{ min}$                                           | Estimated                    |
| Force transition time                                     | $t_{Transition}^{Force}$ | $2 \text{ min}$                                            | Estimated                    |
| Number of nodes with similar radial force                 | $n_{Radial}^{Force}$     | 5                                                          | Estimated                    |
| Number of nodes with similar cortical force               | $n_{Cortex}^{Force}$     | 10                                                         | Estimated                    |
| Number of nodes with similar protrusive force             | $n_{Prot}^{Force}$       | 20                                                         | Estimated                    |
| Force activation probability for radial force             | $p_{Radial}^{Force}$     | 0.01                                                       | Estimated                    |
| Force activation probability for cortical force           | $p_{Cortex}^{Force}$     | 0.01                                                       | Estimated                    |
| Force activation probability for protrusive force         | $p_{Prot}^{Force}$       | 0.1                                                        | Estimated                    |
| Constant for repulsion                                    | $K_{rep}$                | $10^{-3} \text{ (kg/s}^2\text{)}$                          | Estimated                    |
| Maximum distance to apply repulsion                       | $L_{rep}$                | $0.05 \text{ (}\mu\text{m)}$                               | Estimated                    |
| Remodel rate constant                                     | $k_{remodel}$            | $0.025 \text{ s}^{-1}$                                     | Estimated                    |
| Hexagon side length                                       | $l_{hexagon}$            | $25 \text{ (}\mu\text{m)}$                                 | Estimated                    |
| Distance between membrane points                          | $l_n$                    | $625 \text{ (nm)}$                                         | Estimated                    |
| Minimum area for gap formation                            | $A_{GAP,F}$              | $2 \text{ (}\mu\text{m}^2\text{)}$                         | Estimated                    |
| Area for gap closing                                      | $A_{GAP,C}$              | $1.5 \text{ (}\mu\text{m}^2\text{)}$                       | Estimated                    |
| Time step                                                 | $\Delta t$               | $1.26 \text{ (s)}$                                         |                              |

Table S1: Reference model parameters used in the simulation.
